# Supplementary material for: Evolution of a Membrane Protein Regulon in Saccharomyces
Source: PubMed Central journal article supplement — Mol Biol Evol. 2012 Jan 20;29(7):1747–56. doi: 10.1093/molbev/mss017 (PMC3375471; doi:10.1093/molbev/mss017), 2012-01-20
Supplement: supp_mss017_Supplementary_Table_1.pdf [file supp_mss017_Supplementary_Table_1.pdf]

**Supplementary Table 1.** *Cis*-regulatory changes between Saccharomycete species in the genes of the membrane protein regulon.

A

| systematic name | gene name | $R_{Sc/Sp:cis}^a$ | $R_{Sk/Sp:cis}^b$ | $R_{Sb/Sp:cis}^c$ | annotation <sup>d</sup>                                                                                                         |
|-----------------|-----------|-------------------|-------------------|-------------------|---------------------------------------------------------------------------------------------------------------------------------|
| YGR213C         | RTA1      | -4.40             | -3.06             | -2.04             | Member of the fungal lipid-translocating exporter (LTE) family of proteins                                                      |
| YOR134W         | BAG7      | -2.00             | -2.68             | -0.96             | Rho GTPase activating protein                                                                                                   |
| YPL149W         | ATG5      | -0.76             | -2.57             | -1.23             | Involved in autophagy and the Cvt pathway                                                                                       |
| YBR203W         | COS111    | -2.30             | -2.29             | -1.93             | Protein required for resistance to the antifungal drug ciclopirox olamine                                                       |
| YNR059W         | MNT4      | -0.01             | -1.98             | N/A               | Putative alpha-1,3-mannosyltransferase                                                                                          |
| YBR005W         | RCR1      | -1.44             | -1.36             | -1.35             | Protein of the ER membrane involved in cell wall chitin deposition                                                              |
| YMR020W         | FMS1      | -1.22             | -1.35             | 0.71              | Polyamine oxidase, converts spermine to spermidine                                                                              |
| YGR212W         | SLI1      | -1.18             | -1.21             | 0.29              | N-acetyltransferase, confers resistance to the sphingolipid biosynthesis inhibitor myriocin                                     |
| YGR121C         | MEP1      | -1.24             | -1.08             | -0.07             | Ammonium permease                                                                                                               |
| YLR350W         | ORM2      | -1.04             | -0.76             | -0.28             | Controls membrane biogenesis by coordinating lipid homeostasis with protein quality control                                     |
| YDR319C         | YDR319C   | 0.22              | -0.53             | N/A               | Ortholog of the FIT family of proteins involved in triglyceride droplet biosynthesis                                            |
| YML118W         | NGL3      | -1.43             | -0.33             | 0.57              | Putative endonuclease                                                                                                           |
| YLR120C         | YPS1      | -0.65             | -0.28             | N/A               | Aspartic protease, member of the yapsin family of proteases involved in cell wall growth and maintenance                        |
| YGL166W         | CUP2      | -0.53             | -0.25             | -0.50             | Copper-binding transcription factor                                                                                             |
| YGL185C         | YGL185C   | -0.76             | -0.24             | -0.61             | Putative protein with sequence similarity to hydroxyacid dehydrogenases                                                         |
| YDL010W         | GRX6      | -0.12             | -0.22             | -0.54             | <i>Cis</i> -golgi localized monothiol glutaredoxin that binds an iron-sulfur cluster; involved in the oxidative stress response |
| YPL057C         | SUR1      | -0.78             | -0.20             | -0.12             | Probable catalytic subunit of a mannosylinositol phosphorylceramide (MIPC) synthase; involved in sphingolipid biosynthesis      |
| YMR097C         | MTG1      | -0.09             | -0.12             | -0.13             | Putative GTPase peripheral to the mitochondrial inner membrane                                                                  |
| YLR257W         | YLR257W   | 0.06              | -0.11             | 0.71              | Putative protein of unknown function                                                                                            |
| YDL234C         | GYP7      | -0.17             | -0.10             | -0.30             | GTPase-activating protein for yeast Rab family members; involved in vesicle mediated protein trafficking                        |
| YKL159C         | RCN1      | -0.73             | -0.01             | -1.13             | Protein involved in calcineurin regulation during calcium signaling                                                             |
| YHL027W         | RIM101    | 0.35              | 0.09              | N/A               | Transcriptional repressor involved in response to pH and in cell wall construction                                              |
| YLR414C         | PUN1      | -0.62             | 0.23              | -1.34             | Plasma membrane protein with a role in cell wall integrity                                                                      |
| YNL192W         | CHS1      | -0.02             | 0.26              | 0.29              | Catalyzes the transfer of N-acetylglucosamine (GlcNAc) to chitin                                                                |
| YMR316W         | DIA1      | 0.04              | 0.56              | -1.27             | Involved in invasive and pseudohyphal growth                                                                                    |
| YGL006W         | PMC1      | -0.24             | 0.63              | N/A               | Vacuolar Ca <sup>2+</sup> ATPase involved in depleting cytosol of Ca <sup>2+</sup> ions                                         |
| YNL003C         | PET8      | 0.78              | 0.68              | 0.97              | S-adenosylmethionine transporter of the mitochondrial inner membrane                                                            |
| YMR096W         | SNZ1      | -1.44             | 0.78              | N/A               | Protein involved in vitamin B6 biosynthesis                                                                                     |
| YBR287W         | YBR287W   | 1.41              | 0.96              | 0.89              | Protein of unknown function                                                                                                     |
| YGR268C         | HUA1      | 1.63              | 1.23              | N/A               | Cytoplasmic protein containing a zinc finger domain with sequence similarity to that of Type I J-proteins                       |

|           |         |       |      |       |                                                                                                                                      |
|-----------|---------|-------|------|-------|--------------------------------------------------------------------------------------------------------------------------------------|
| YJL171C   | YJL171C | 0.06  | 1.35 | 0.46  | GPI-anchored cell wall protein of unknown function; induced in response to cell wall damaging agents                                 |
| YNR010W   | CSE2    | 1.89  | 1.89 | 2.24  | Subunit of the RNA polymerase II mediator complex                                                                                    |
| YLR194C   | YLR194C | 1.87  | 2.14 | 1.44  | Structural constituent of the cell wall attached to the plasma membrane by a GPI-anchor; upregulated in response to cell wall stress |
| YNR064C   | YNR064C | -0.95 | N/A  | -3.61 | Epoxide hydrolase, member of the alpha/beta hydrolase fold family                                                                    |
| YOR385W   | YOR385W | -1.62 | N/A  | -1.65 | Putative protein of unknown function                                                                                                 |
| YGL183C   | MND1    | -0.12 | N/A  | 0.15  | Protein required for recombination and meiotic nuclear division                                                                      |
| YLR054C   | OSW2    | 0.15  | N/A  | 1.05  | Protein of unknown function proposed to be involved in the assembly of the spore wall                                                |
| YGR288W   | MAL13   | 0.86  | N/A  | N/A   | MAL-activator protein, part of complex locus MAL1                                                                                    |
| YER185W   | PUG1    | -0.81 | N/A  | N/A   | Plasma membrane protein with roles in the uptake of protoporphyrin IX and the efflux of heme                                         |
| YHR139C   | SPS100  | 0.12  | N/A  | N/A   | Protein required for spore wall maturation                                                                                           |
| YMR040W   | YET2    | -0.22 | N/A  | N/A   | Protein of unknown function that may interact with ribosomes                                                                         |
| YKL218C   | SRY1    | 3.01  | N/A  | N/A   | 3-hydroxyaspartate dehydratase, deaminates L-threo-3-hydroxyaspartate to form oxaloacetate and ammonia                               |
| YPR198W   | SGE1    | 3.26  | N/A  | N/A   | Plasma membrane multidrug transporter of the major facilitator superfamily                                                           |
| YGL051W   | MST27   | -3.00 | N/A  | N/A   | Putative integral membrane protein, involved in vesicle formation                                                                    |
| YCR007C   | YCR007C | -0.66 | N/A  | N/A   | Putative integral membrane protein                                                                                                   |
| YER184C   | YER184C | 0.00  | N/A  | N/A   | Putative zinc cluster protein                                                                                                        |
| YLR438C-A | LSM3    | 1.12  | N/A  | N/A   | Lsm (Like Sm) protein; involved in mRNA decay                                                                                        |

## B

|                                          | <i>S. cerevisiae</i> - <i>S. paradoxus</i> | <i>S. kudriavzevii</i> - <i>S. paradoxus</i> | <i>S. bayanus</i> - <i>S. paradoxus</i> |
|------------------------------------------|--------------------------------------------|----------------------------------------------|-----------------------------------------|
| number of genes                          | 47                                         | 33                                           | 30                                      |
| $\Sigma R_{Sx/Sp,cis}$                   | -13.75                                     | -9.94                                        | -9.31                                   |
| $p(\Sigma R_{Sx/Sp,cis})^d$              | 0.006                                      | 0.014                                        | 0.007                                   |
| $p(\Sigma \text{sign}[R_{Sx/Sp,cis}])^e$ | 0.043                                      | 0.029                                        | 0.070                                   |

<sup>a</sup> The  $\log_2$  of the ratio of expression of the *S. cerevisiae* allele and that of the *S. paradoxus* allele in the interspecific hybrid.

<sup>b</sup> The estimated effect of *cis*-regulatory variation between *S. kudriavzevii* and *S. paradoxus*, based on expression measurements in interspecific hybrids between each species and *S. cerevisiae*. N/A, missing data.

<sup>c</sup> The estimated effect of *cis*-regulatory variation between *S. bayanus* and *S. paradoxus*, based on expression measurements in interspecific hybrids between each species and *S. cerevisiae*. N/A, missing data.

<sup>d</sup> Significance of a one-sided resampling test relative to the genomic null for an extreme value of the sum of the estimated effects of *cis*-regulatory variation between the indicated species and *S. paradoxus*.

<sup>e</sup> Significance of a one-sided resampling test relative to the genomic null for an extreme value of the sum of the signs of estimated effects of *cis*-regulatory variation between the indicated species and *S. paradoxus*.
