# Supplementary material for: Evolution of a Membrane Protein Regulon in Saccharomyces
Source: PubMed Central journal article supplement — Mol Biol Evol. 2012 Jan 20;29(7):1747–56. doi: 10.1093/molbev/mss017 (PMC3375471; doi:10.1093/molbev/mss017), 2012-01-20
Supplement: supp_mss017_Supplementary_Table_2.pdf [file supp_mss017_Supplementary_Table_2.pdf]

**Supplementary Table 2.** Tests for extreme branch lengths inferred from promoters of the membrane protein group.

| species                | branch length, membrane group <sup>a</sup> | branch length, genome <sup>b</sup> | <i>p</i> <sup>c</sup> |
|------------------------|--------------------------------------------|------------------------------------|-----------------------|
| <i>S. paradoxus</i>    | 0.077                                      | 0.082 (.0026)                      | 0.020                 |
| <i>S. cerevisiae</i>   | 0.129                                      | 0.131 (.0034)                      | 0.236                 |
| <i>S. mikatae</i>      | 0.194                                      | 0.192 (.0038)                      | 0.753                 |
| <i>S. kudriavzevii</i> | 0.176                                      | 0.180 (.0038)                      | 0.196                 |
| <i>S. bayanus</i>      | 0.276                                      | 0.257 (.0054)                      | 0.999                 |

<sup>a</sup> Evolutionary rate, in substitutions per site, for the terminal branch in the *Saccharomyces* phylogeny leading to the indicated species, inferred from the concatenated promoters of the membrane protein regulon and normalized with respect to total tree length.

<sup>b</sup> Evolutionary rate, in substitutions per site, for the terminal branch in the *Saccharomyces* phylogeny leading to the indicated species normalized with respect to total tree length, as an average of inferences from the concatenated promoters of each of 10,000 randomly chosen gene groups. The standard deviation is given in parentheses.

<sup>c</sup> Significance of a one-sided resampling test relative to the genomic null for short length of the terminal branch to the indicated species.
