# Supplementary figures and images for: Evolution of a Membrane Protein Regulon in Saccharomyces
Source: PubMed Central journal article supplement — Mol Biol Evol. 2012 Jan 20;29(7):1747–56. doi: 10.1093/molbev/mss017 (PMC3375471; doi:10.1093/molbev/mss017), 2012-01-20

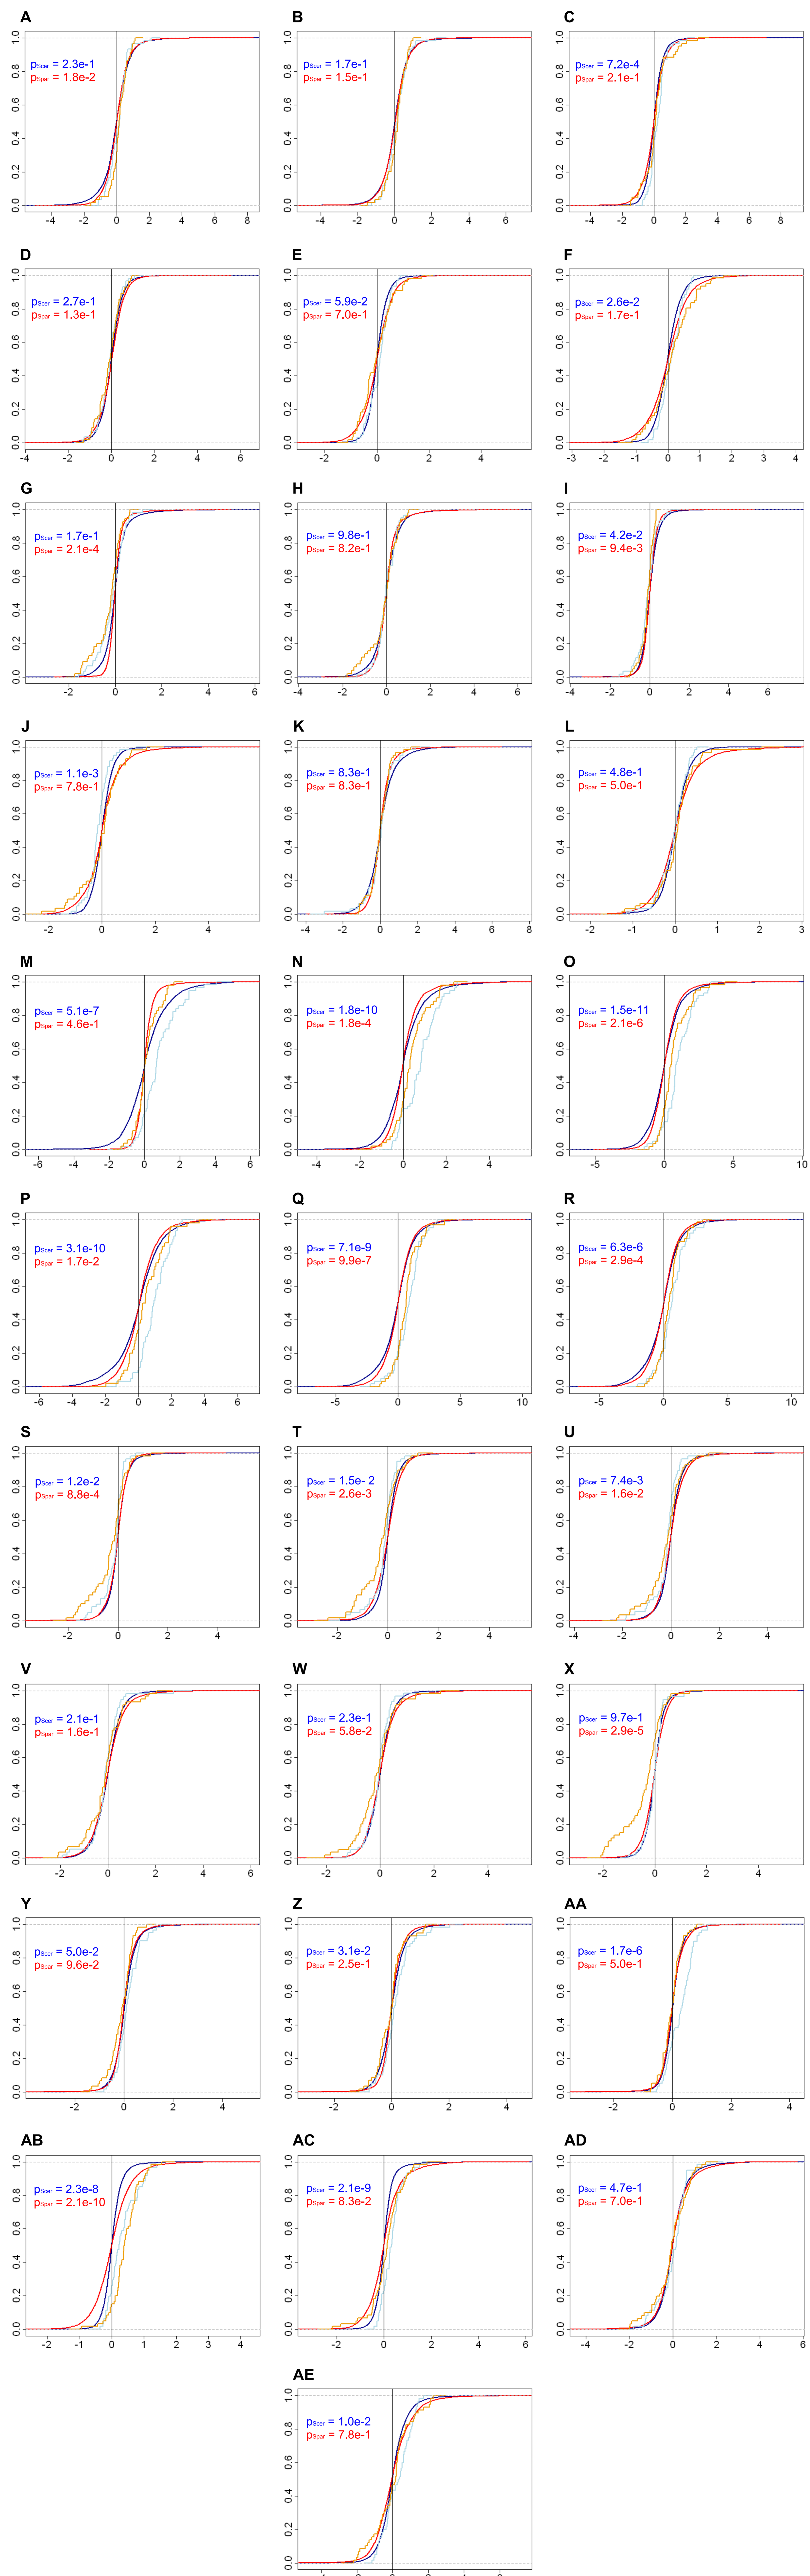

Supplement: supp_mss017_Figure_S1.pdf [file supp_mss017_Figure_S1.pdf]

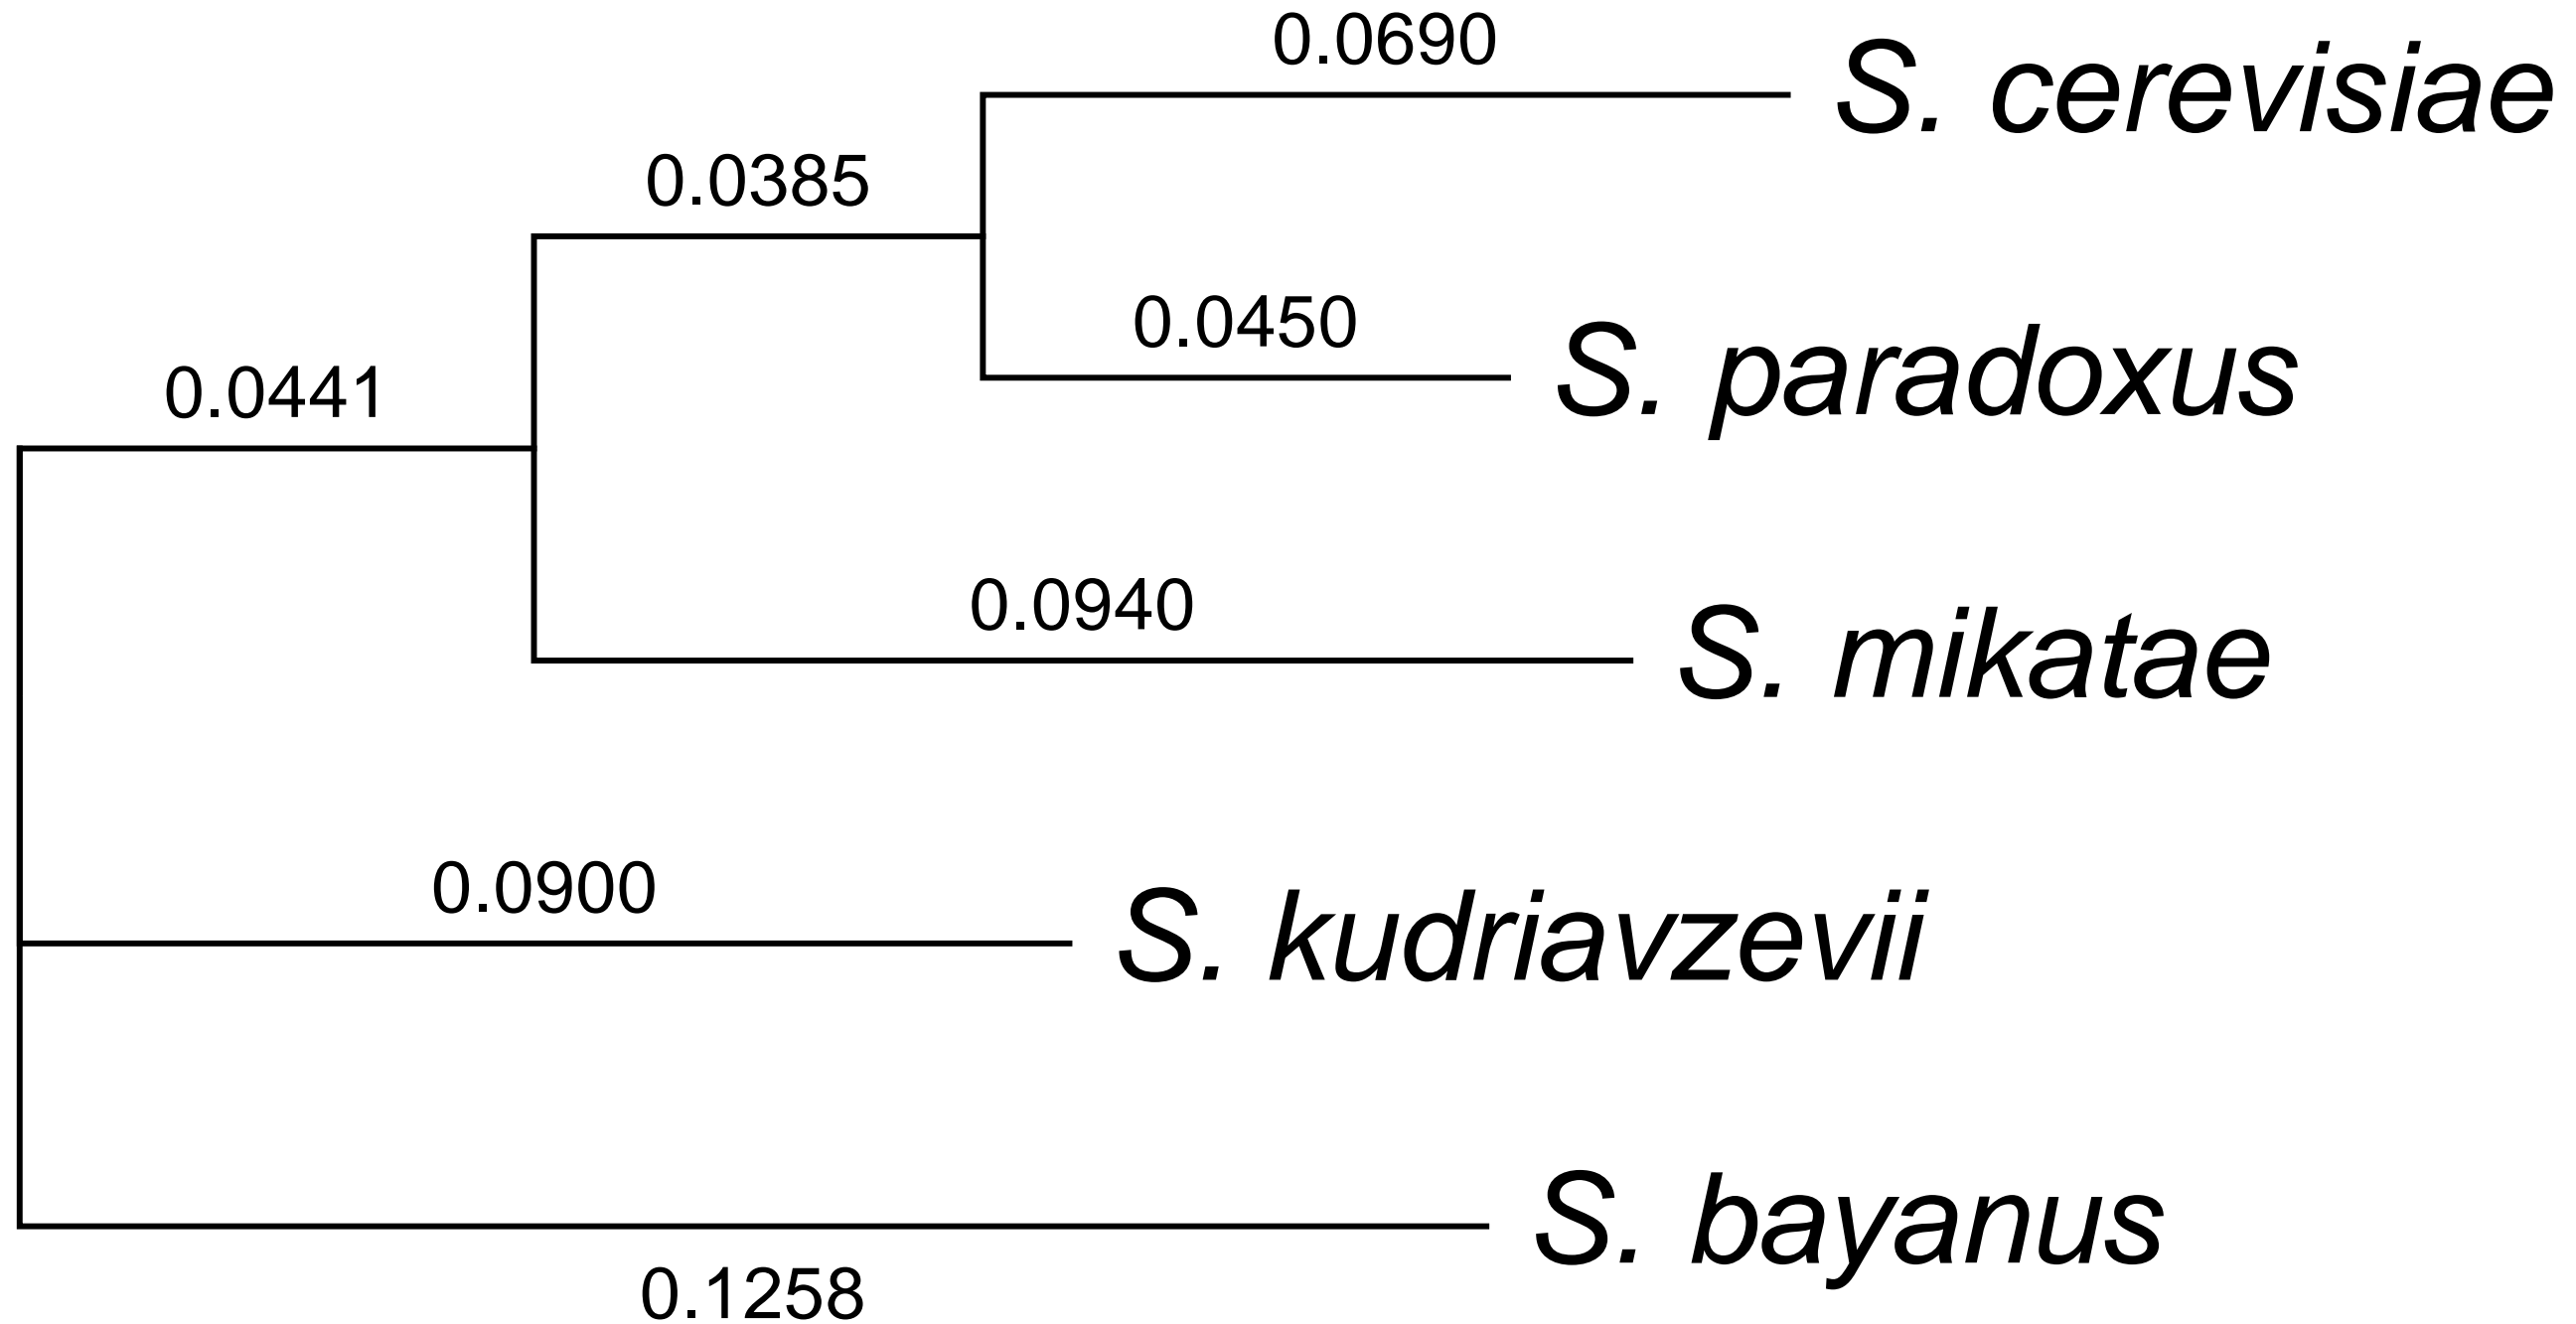

Supplement: supp_mss017_Figure_S2.pdf [file supp_mss017_Figure_S2.pdf]
